# Supplementary material for: Automated synthesis of sialylated oligosaccharides
Source: PubMed Central journal article supplement (PMC3510992; doi:10.3762/bjoc.8.183), 2012-09-21

# Supporting Information

for

## Automated synthesis of sialylated oligosaccharides

Davide Esposito<sup>1,2</sup>, Mattan Hurevich<sup>1,2</sup>, Bastien Castagner<sup>3</sup>, Cheng-Chung Wang<sup>4</sup> and Peter H. Seeberger<sup>1,2\*</sup>

Address: <sup>1</sup>Max-Planck-Institute of Colloids and Interfaces, Department of Biomolecular Systems, Am Mühlenberg 1, 14476 Potsdam, Germany, <sup>2</sup>Freie Universität Berlin, Institute of Chemistry and Biochemistry, Arnimallee 22, 14195 Berlin, Germany, <sup>3</sup>Institute of Pharmaceutical Sciences, Swiss Federal Institute of Technology (ETH) Zurich, 8093 Zurich, Switzerland and <sup>4</sup>Institute of Chemistry, Academia Sinica, Taipei, 11529, Taiwan

Email: Peter H. Seeberger - Peter.Seeberger@mpikg.mpg.de

\*Corresponding author

### **<sup>1</sup>H and <sup>13</sup>C NMR spectra for new compounds**

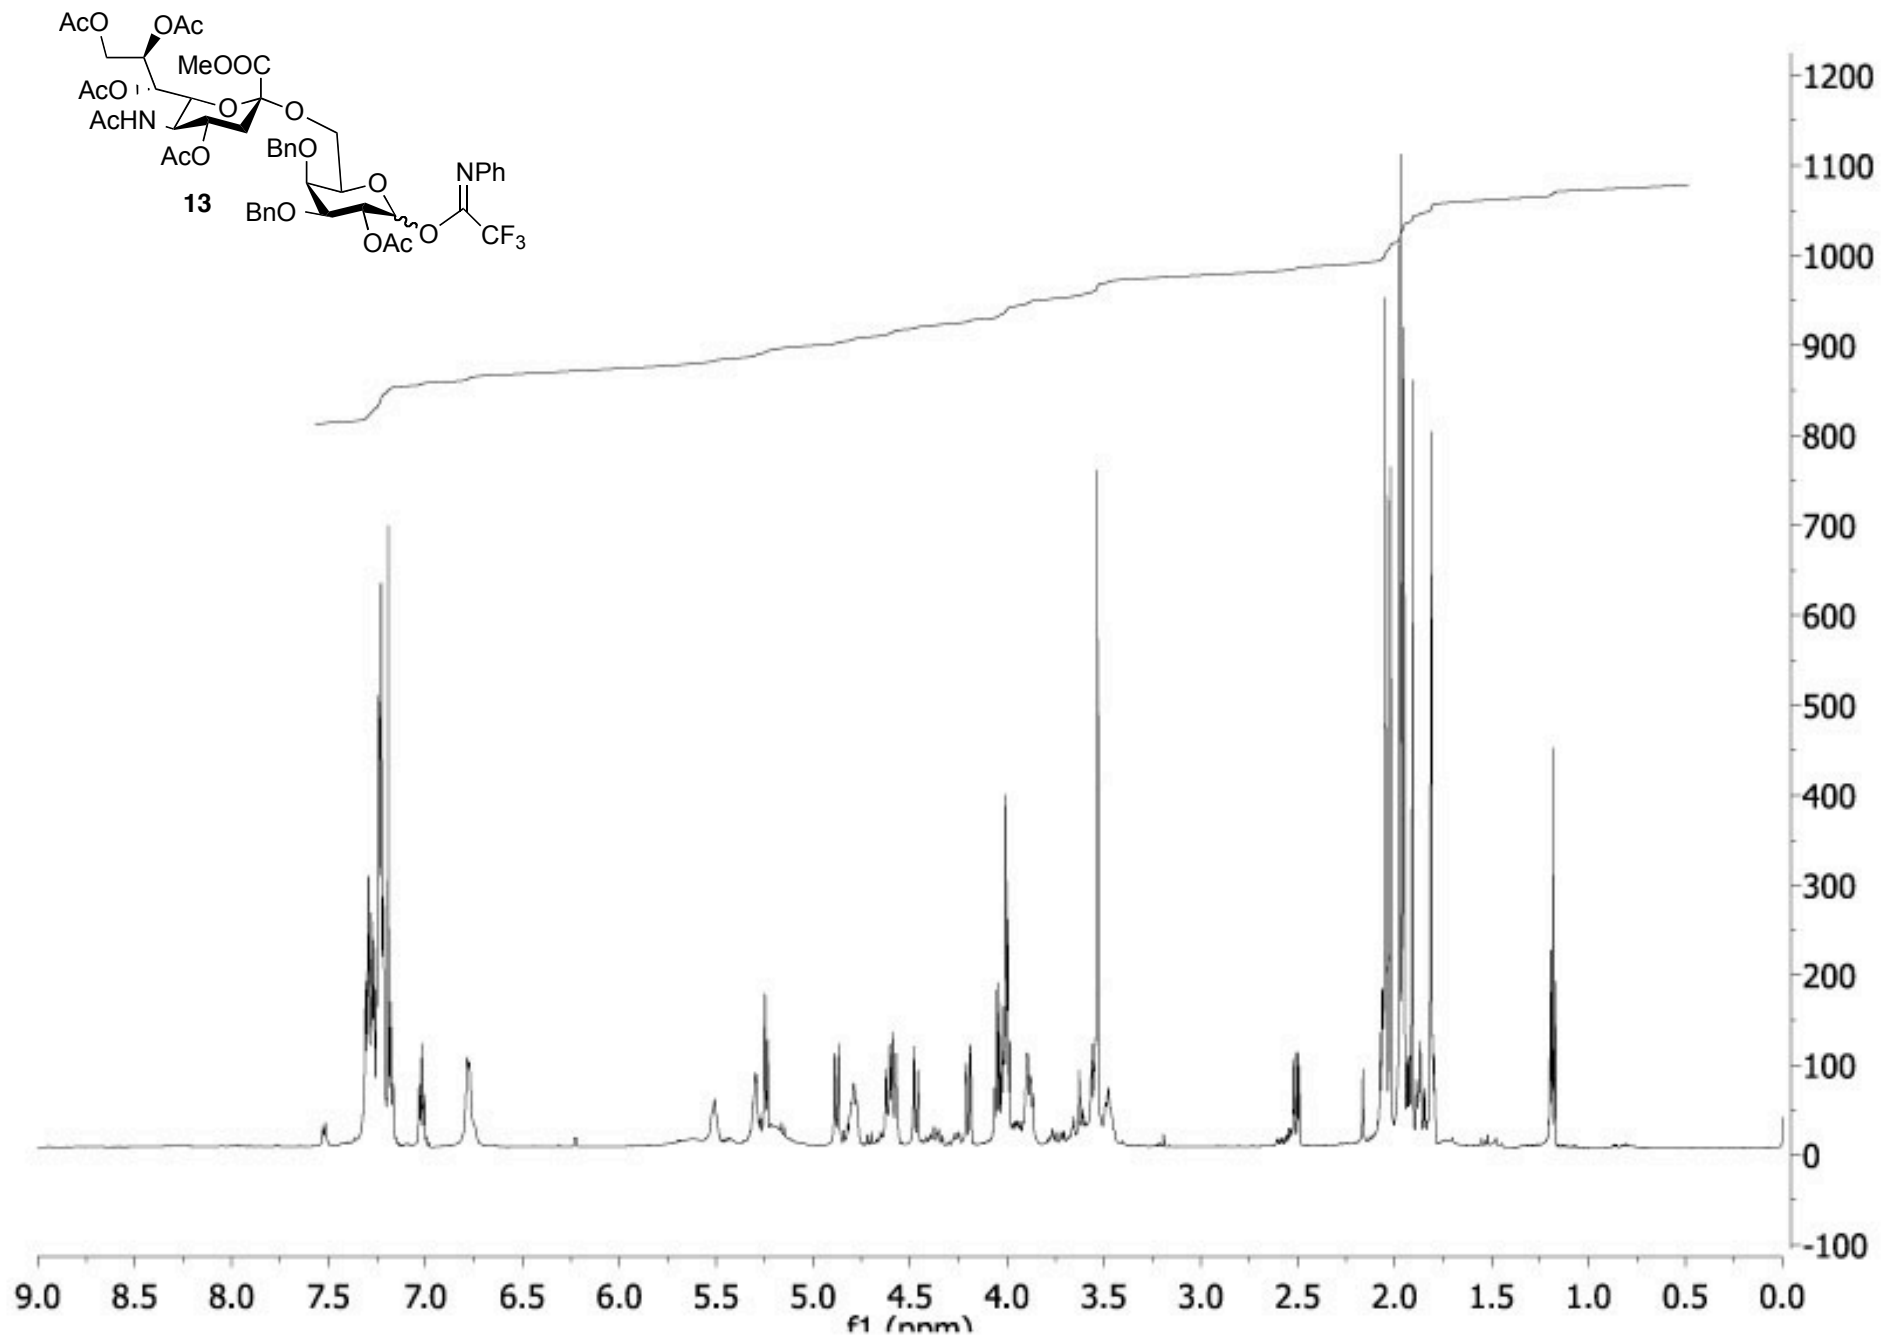

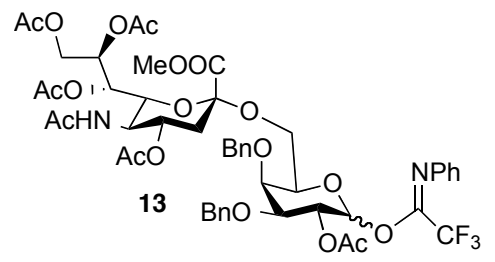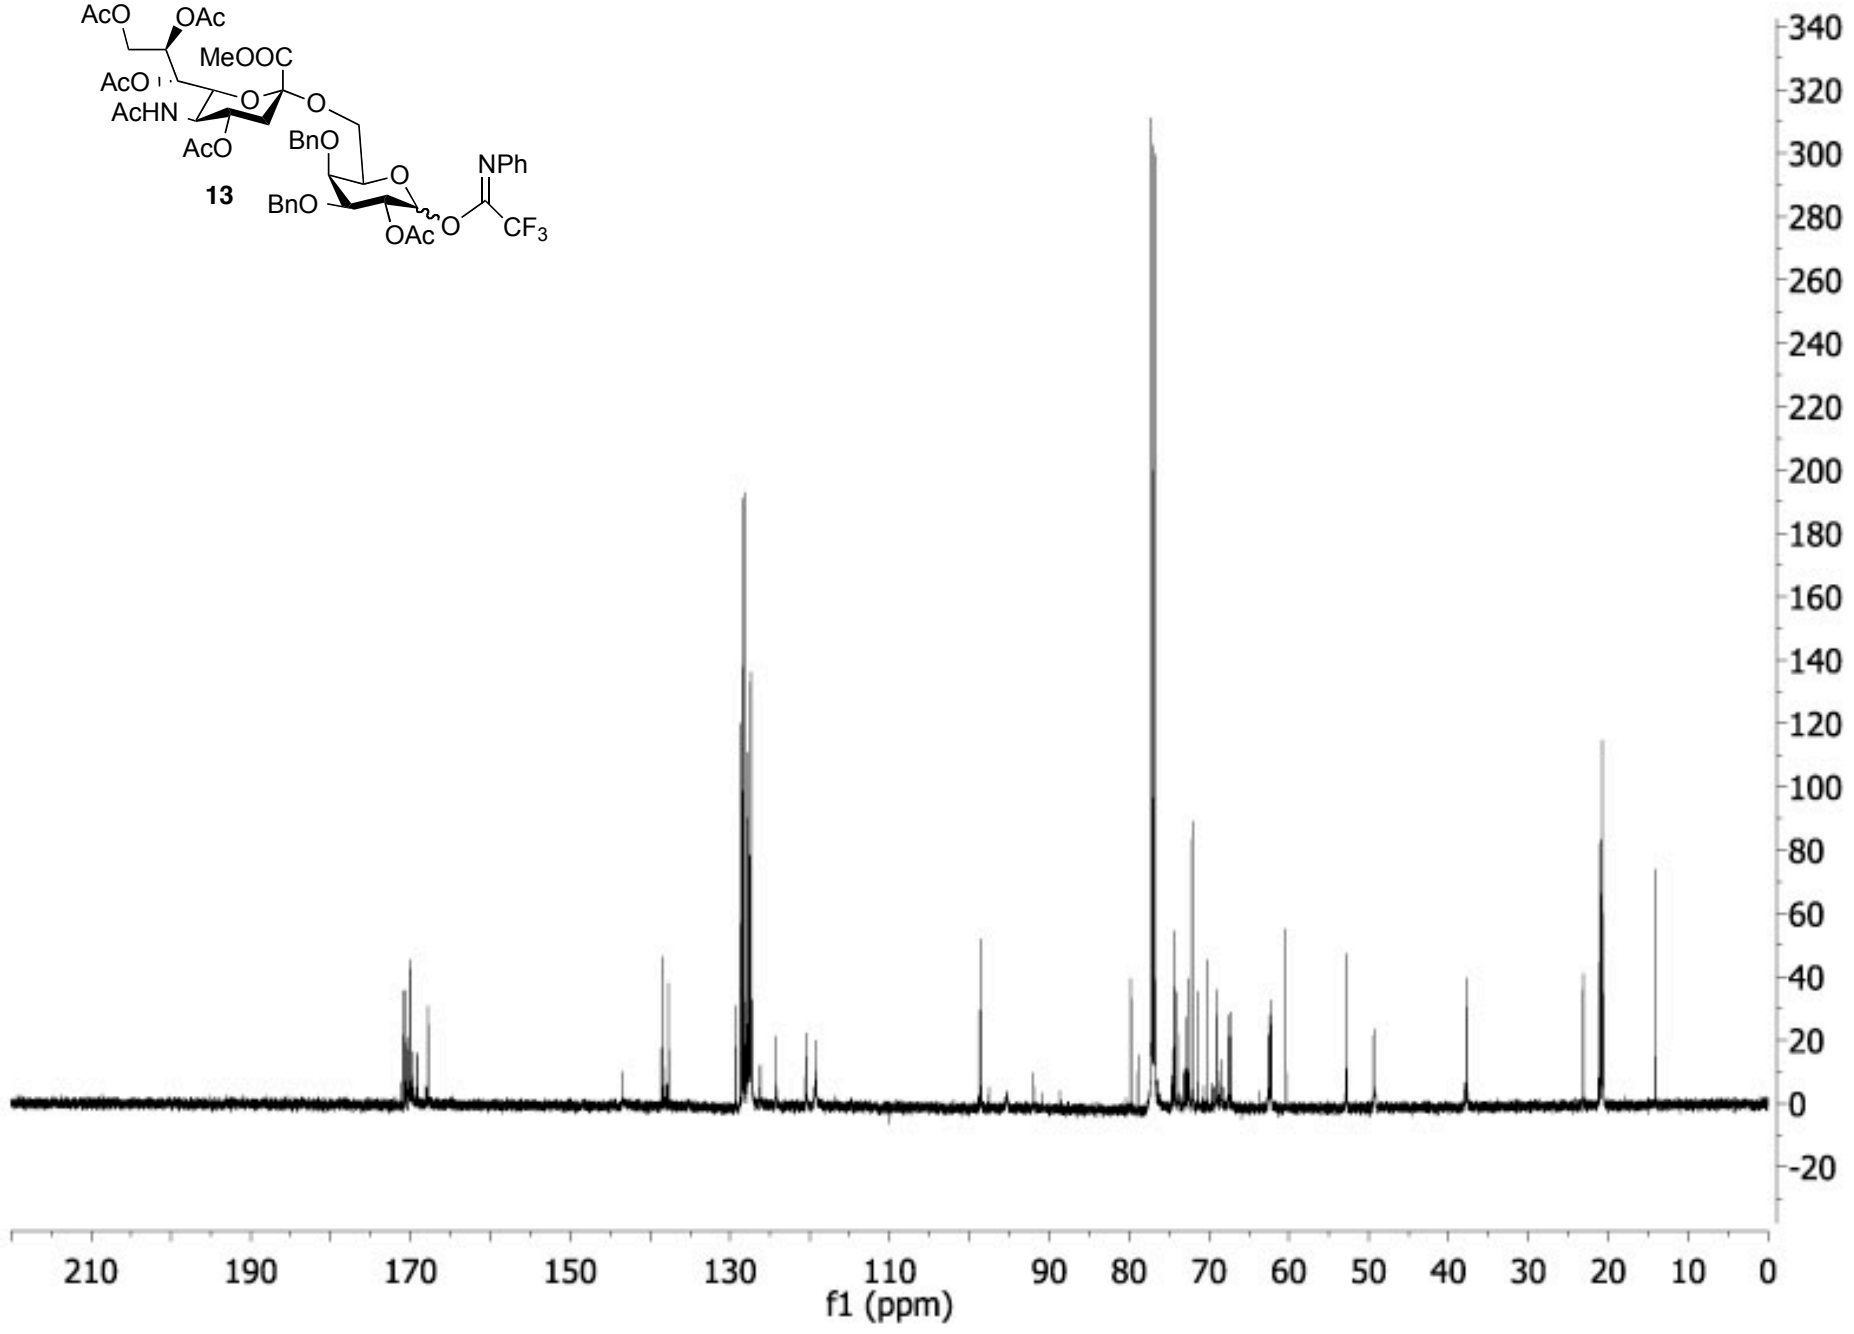

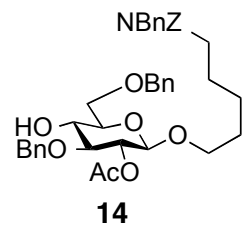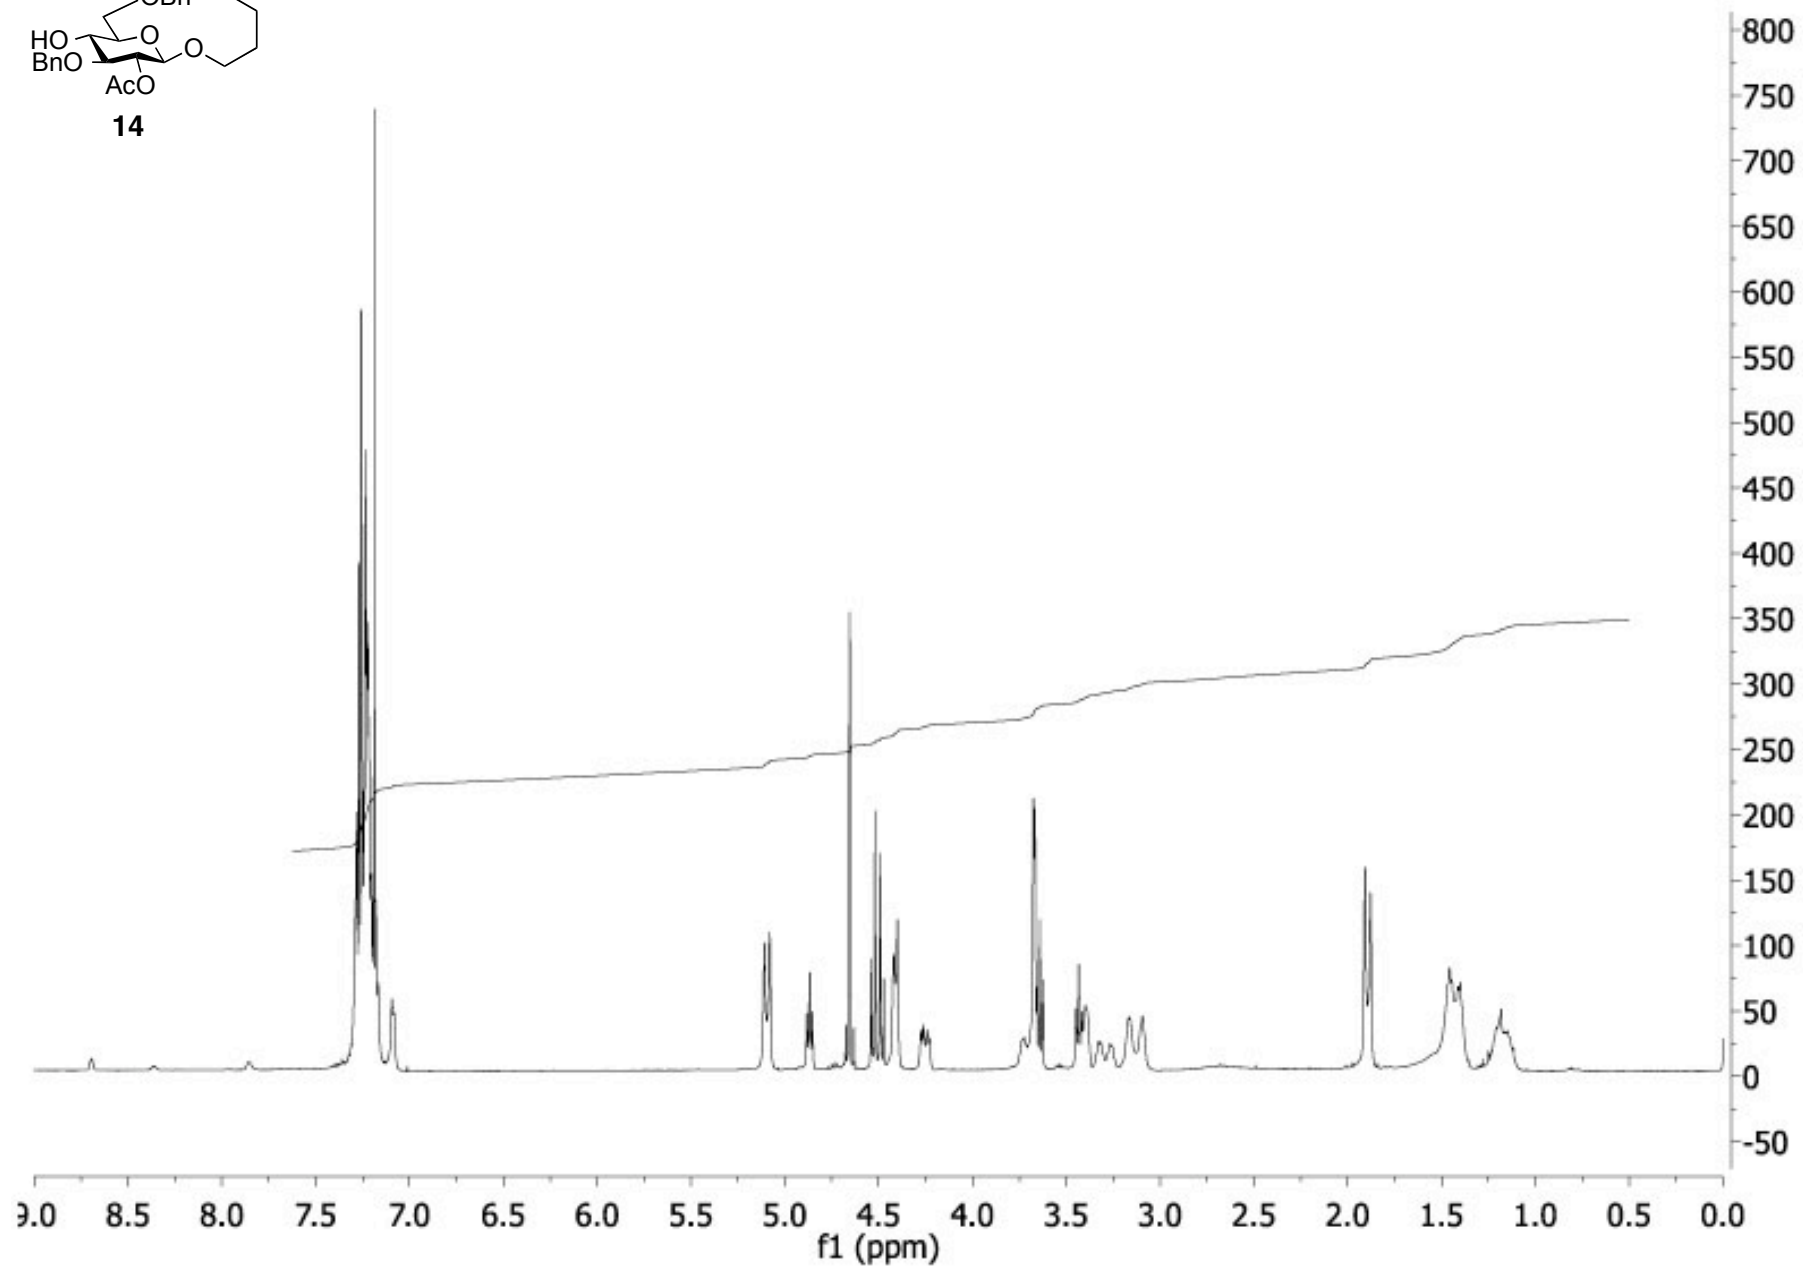

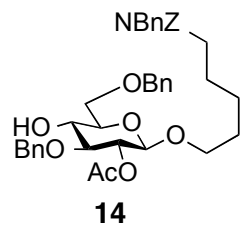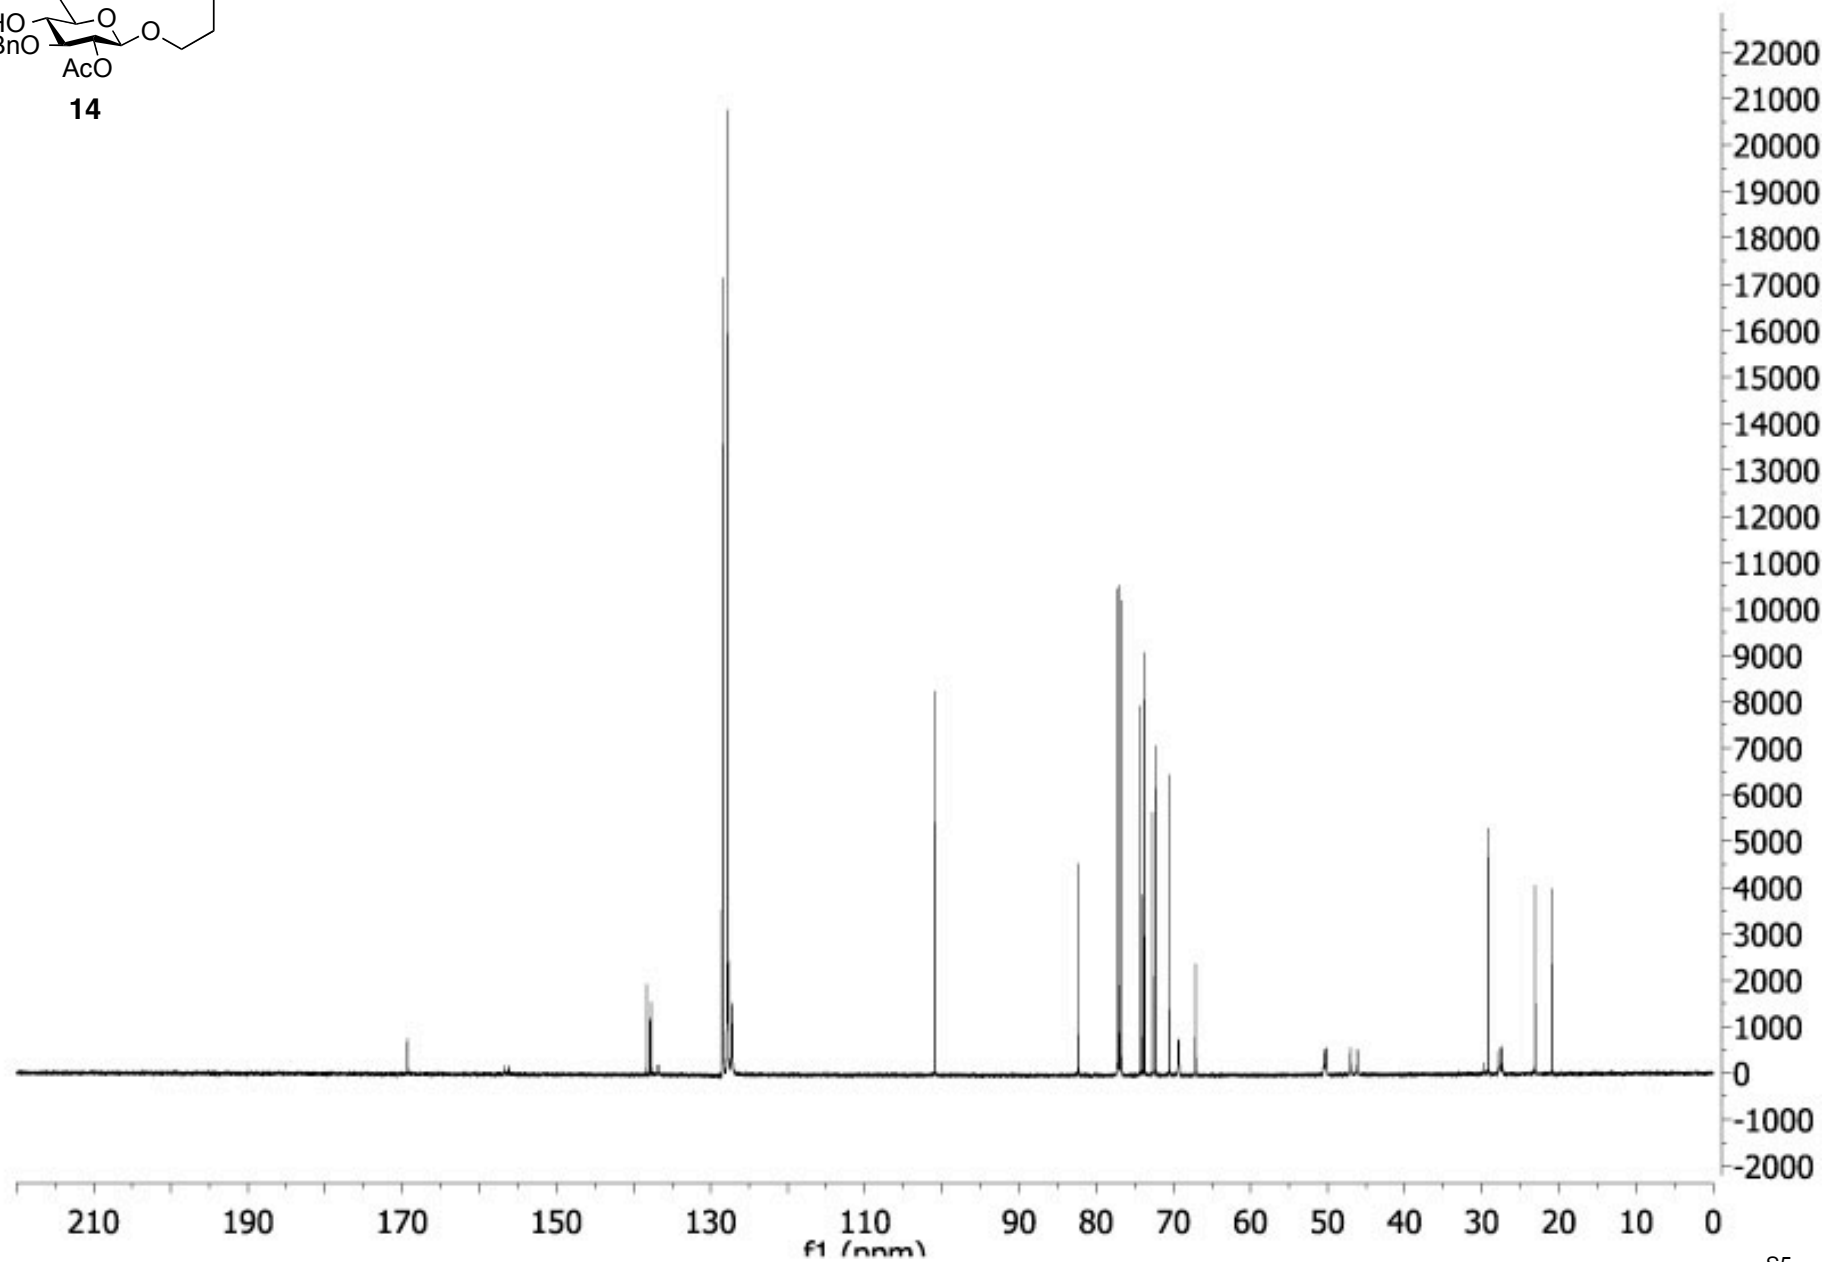





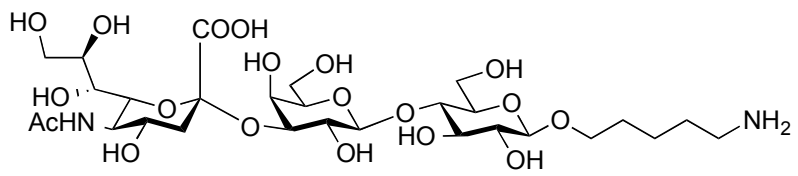

16

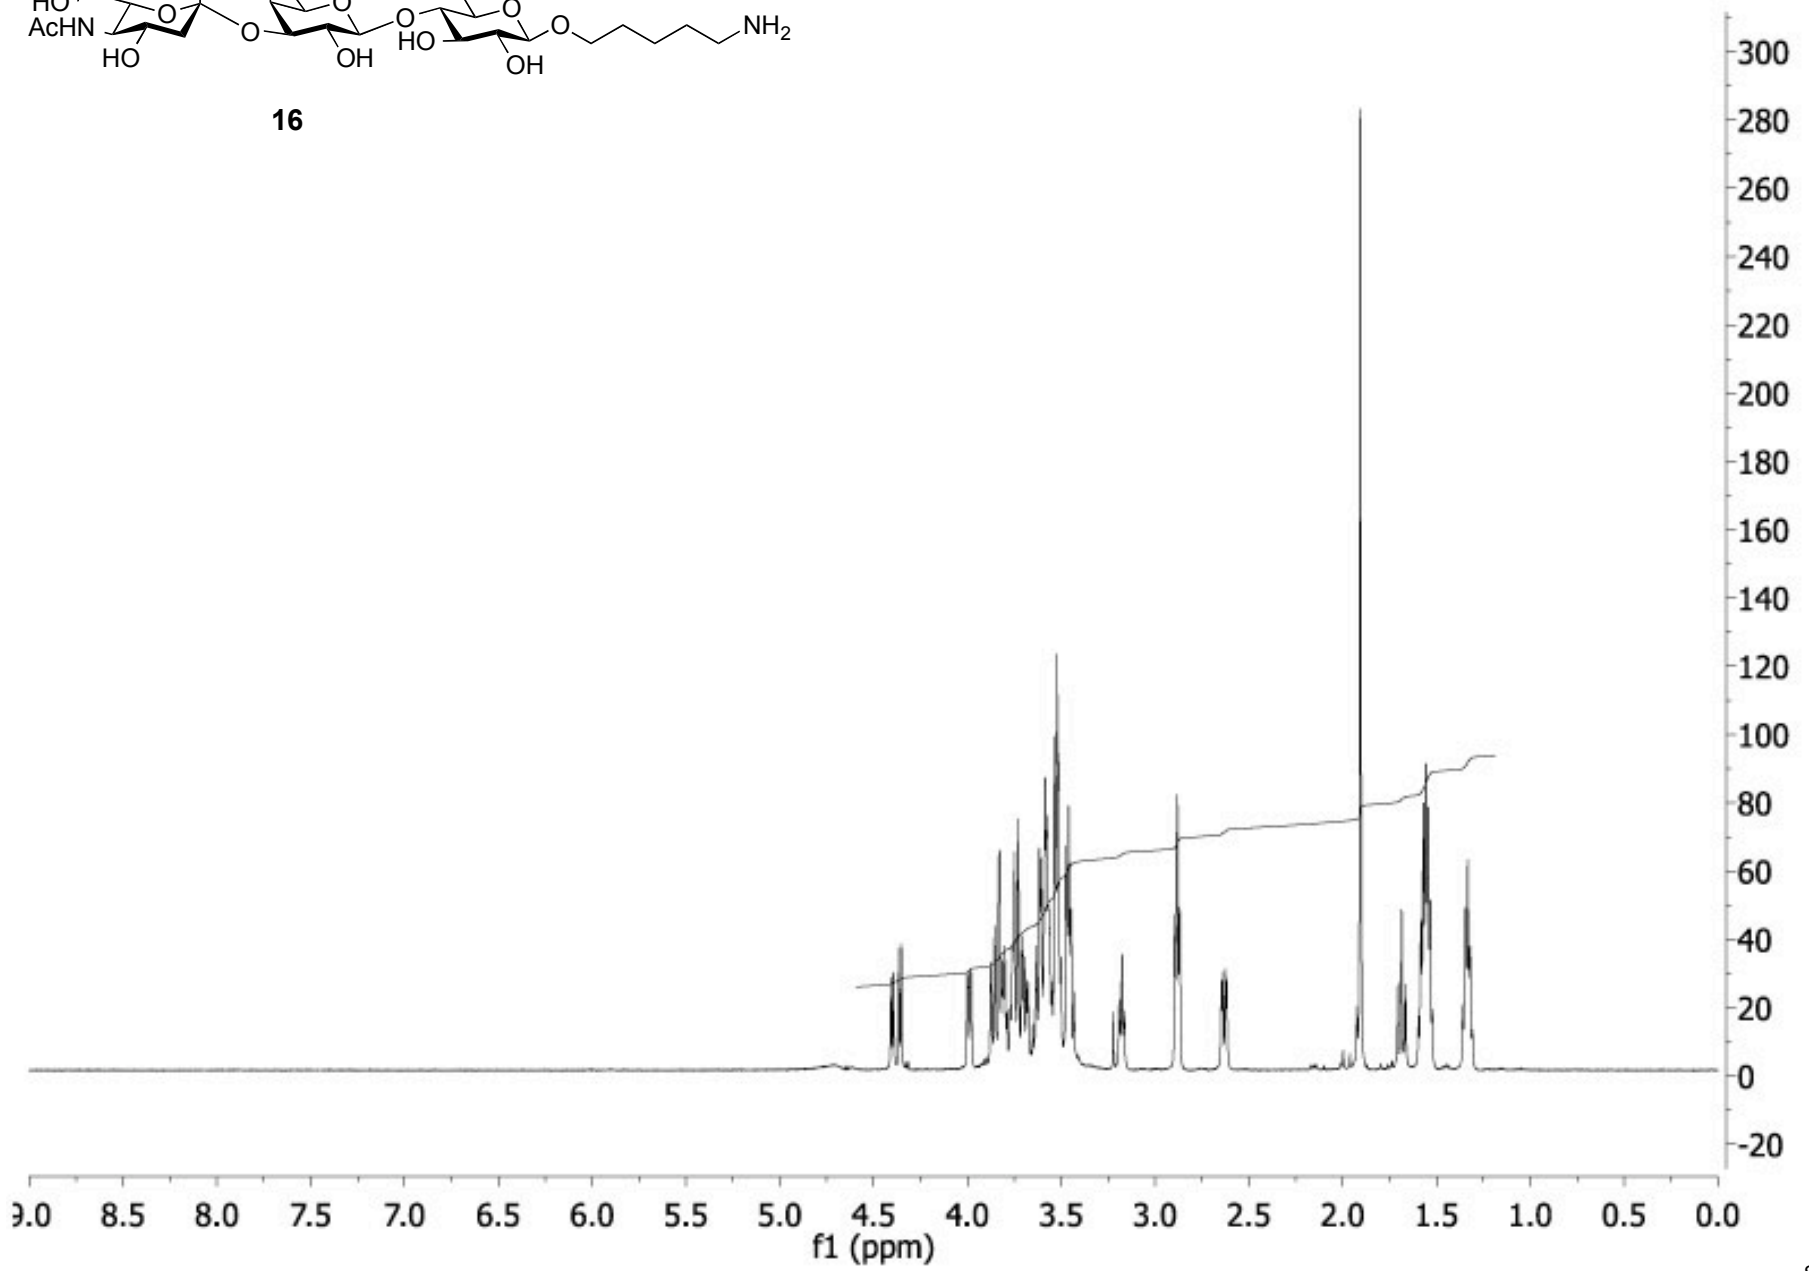





16

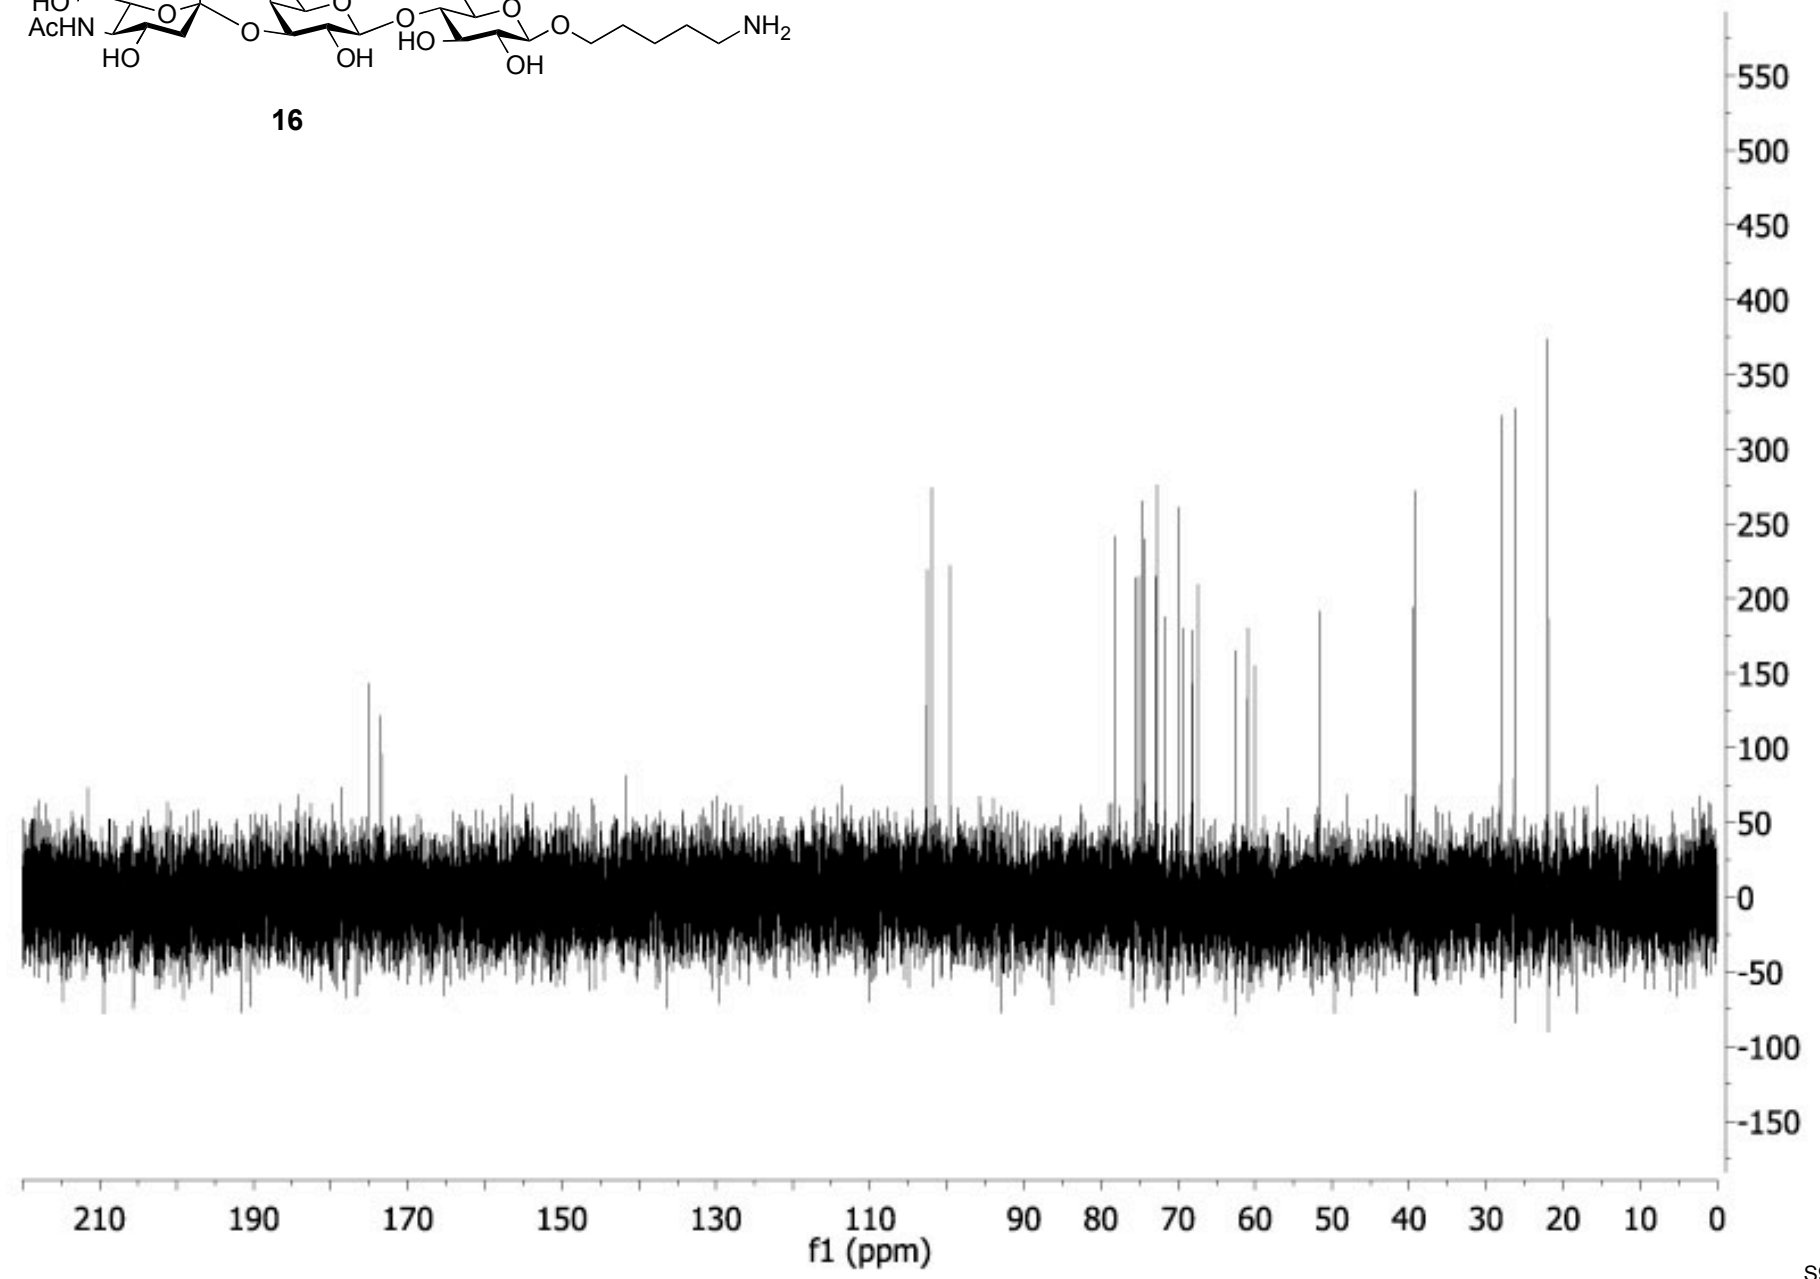

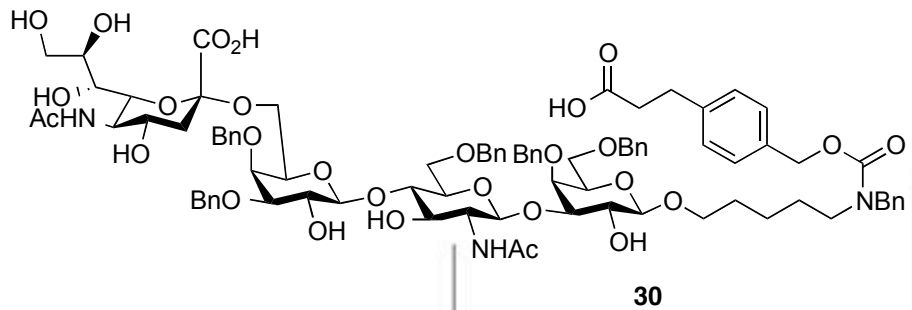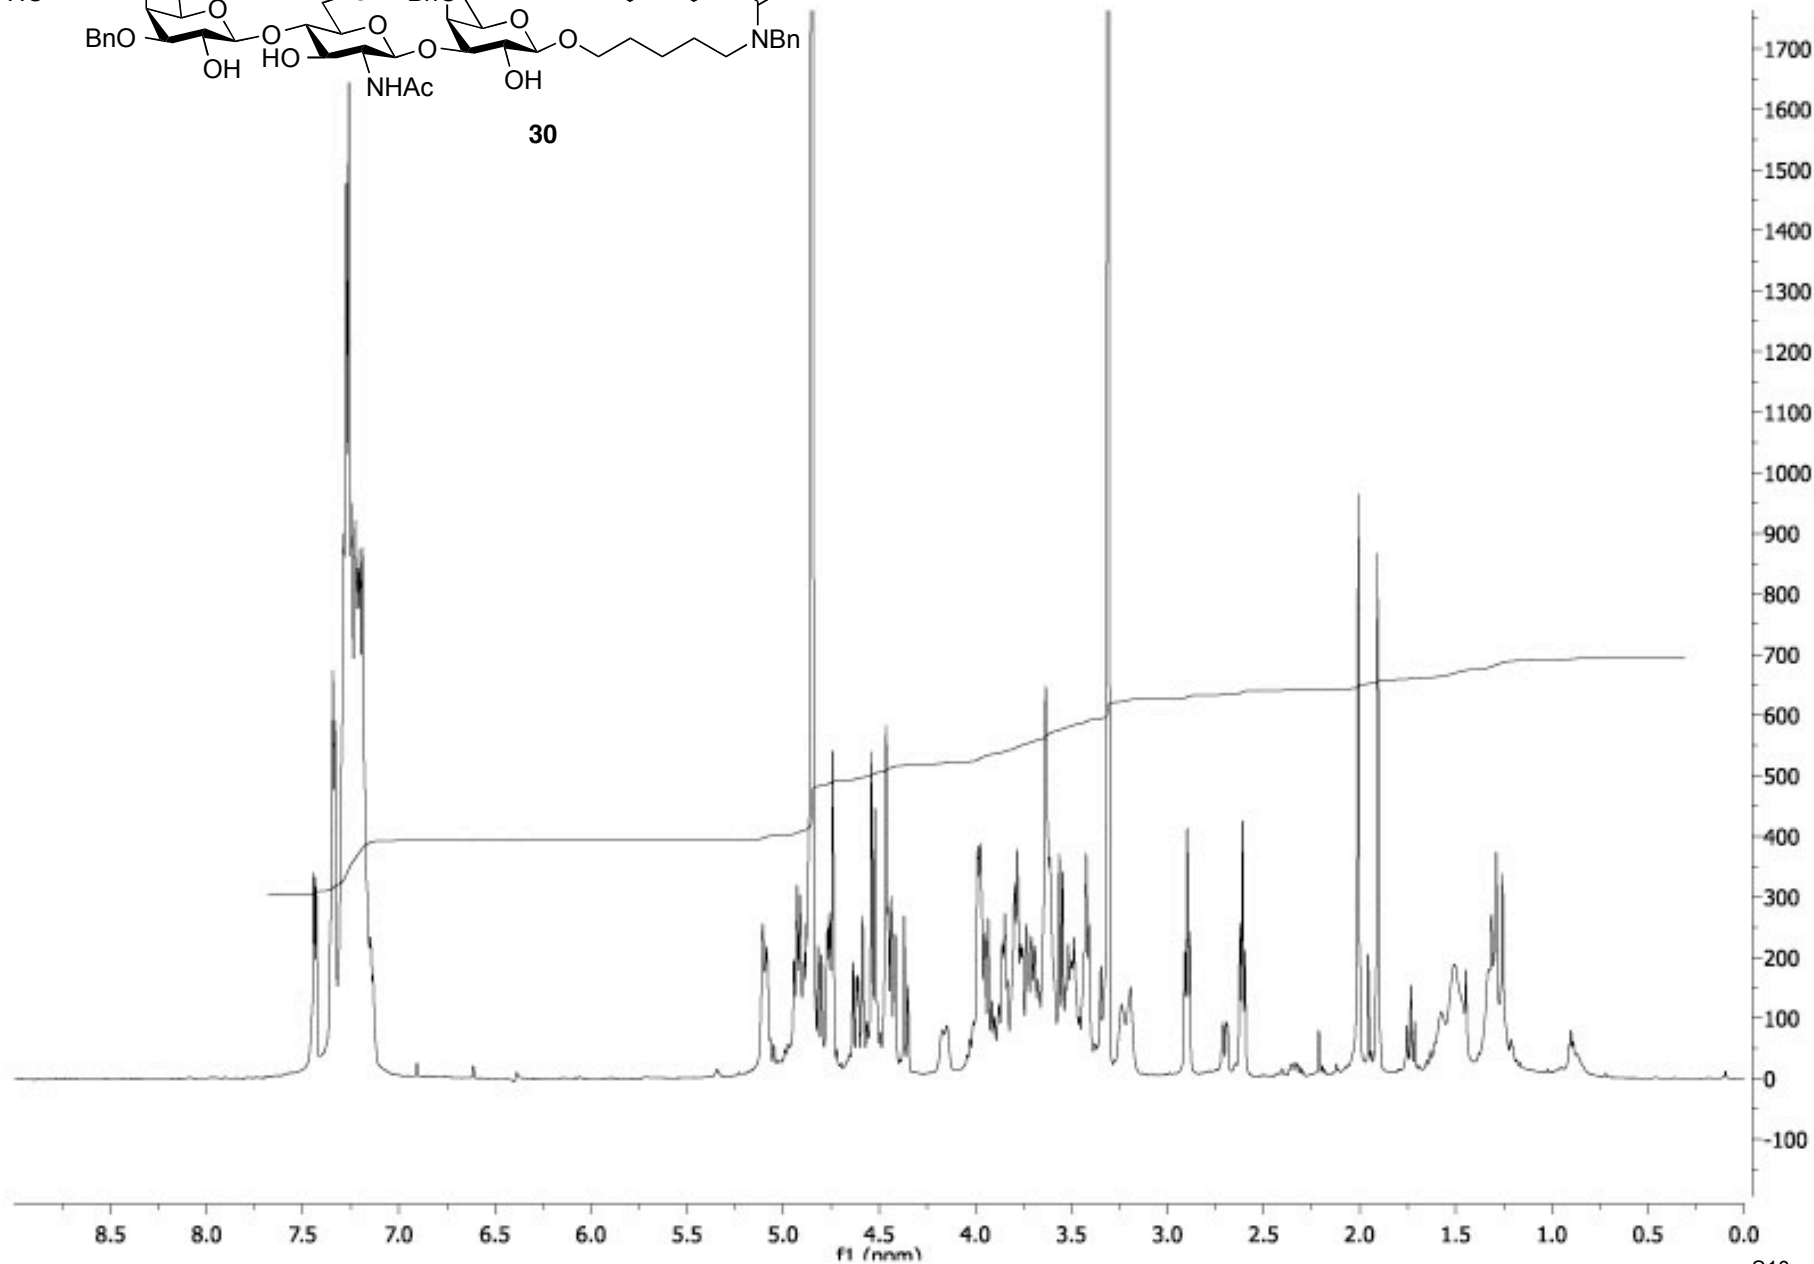

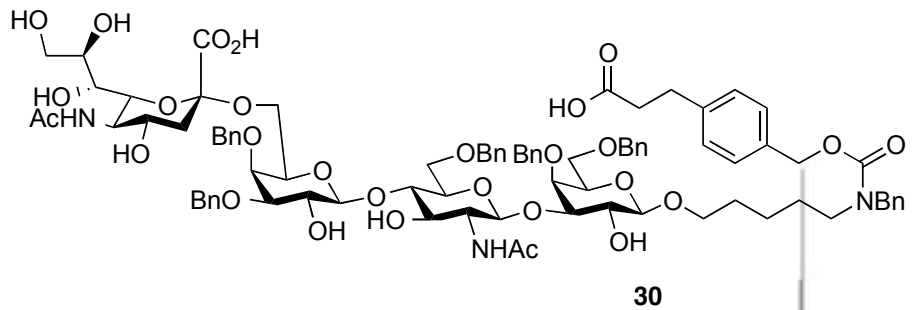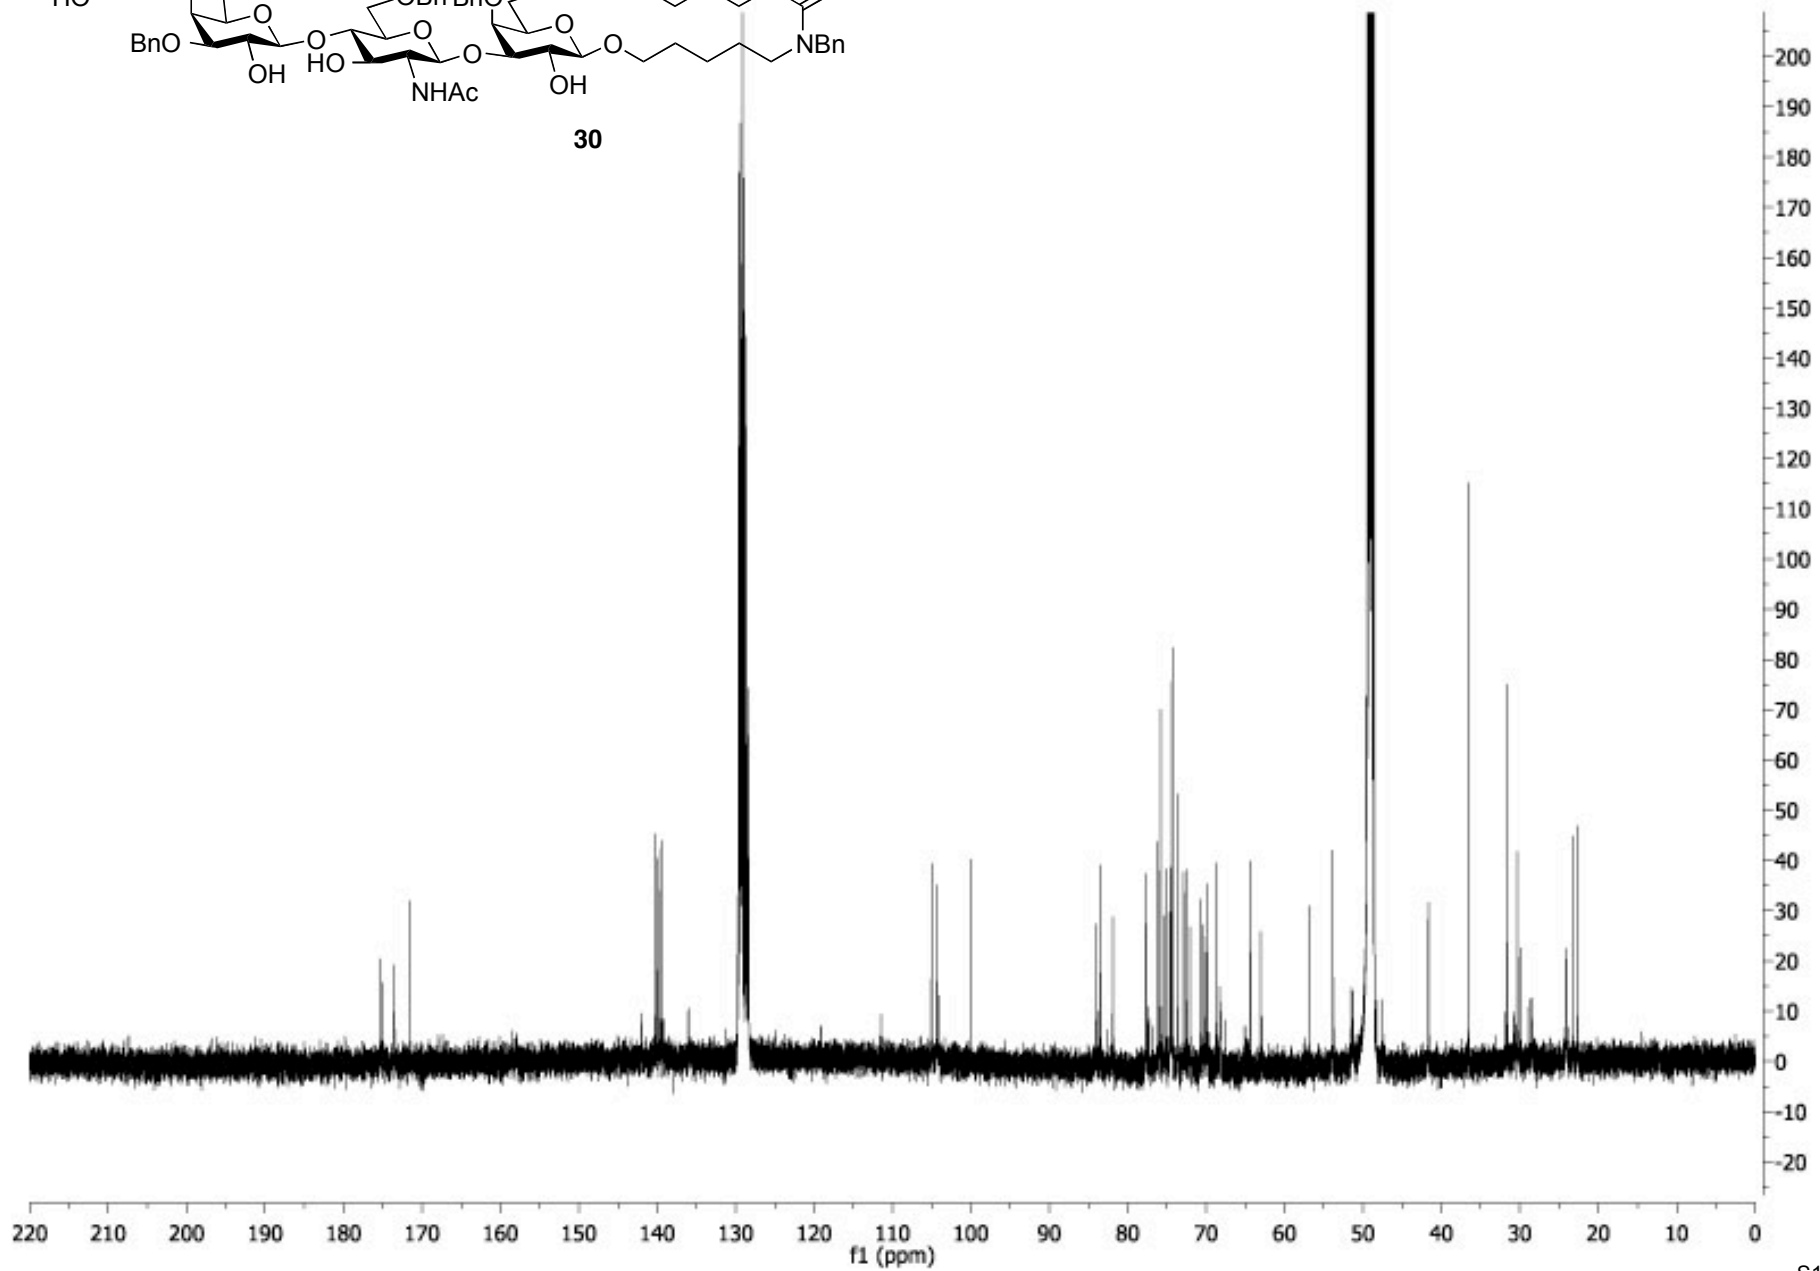

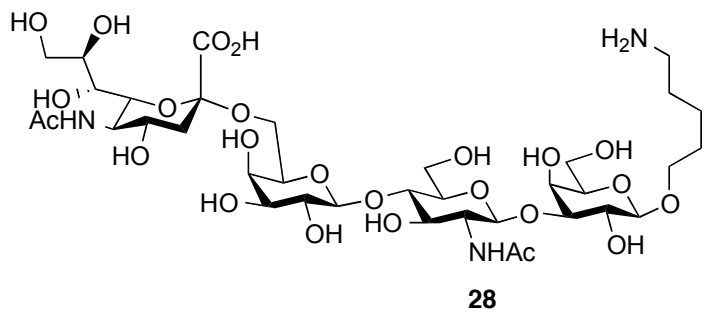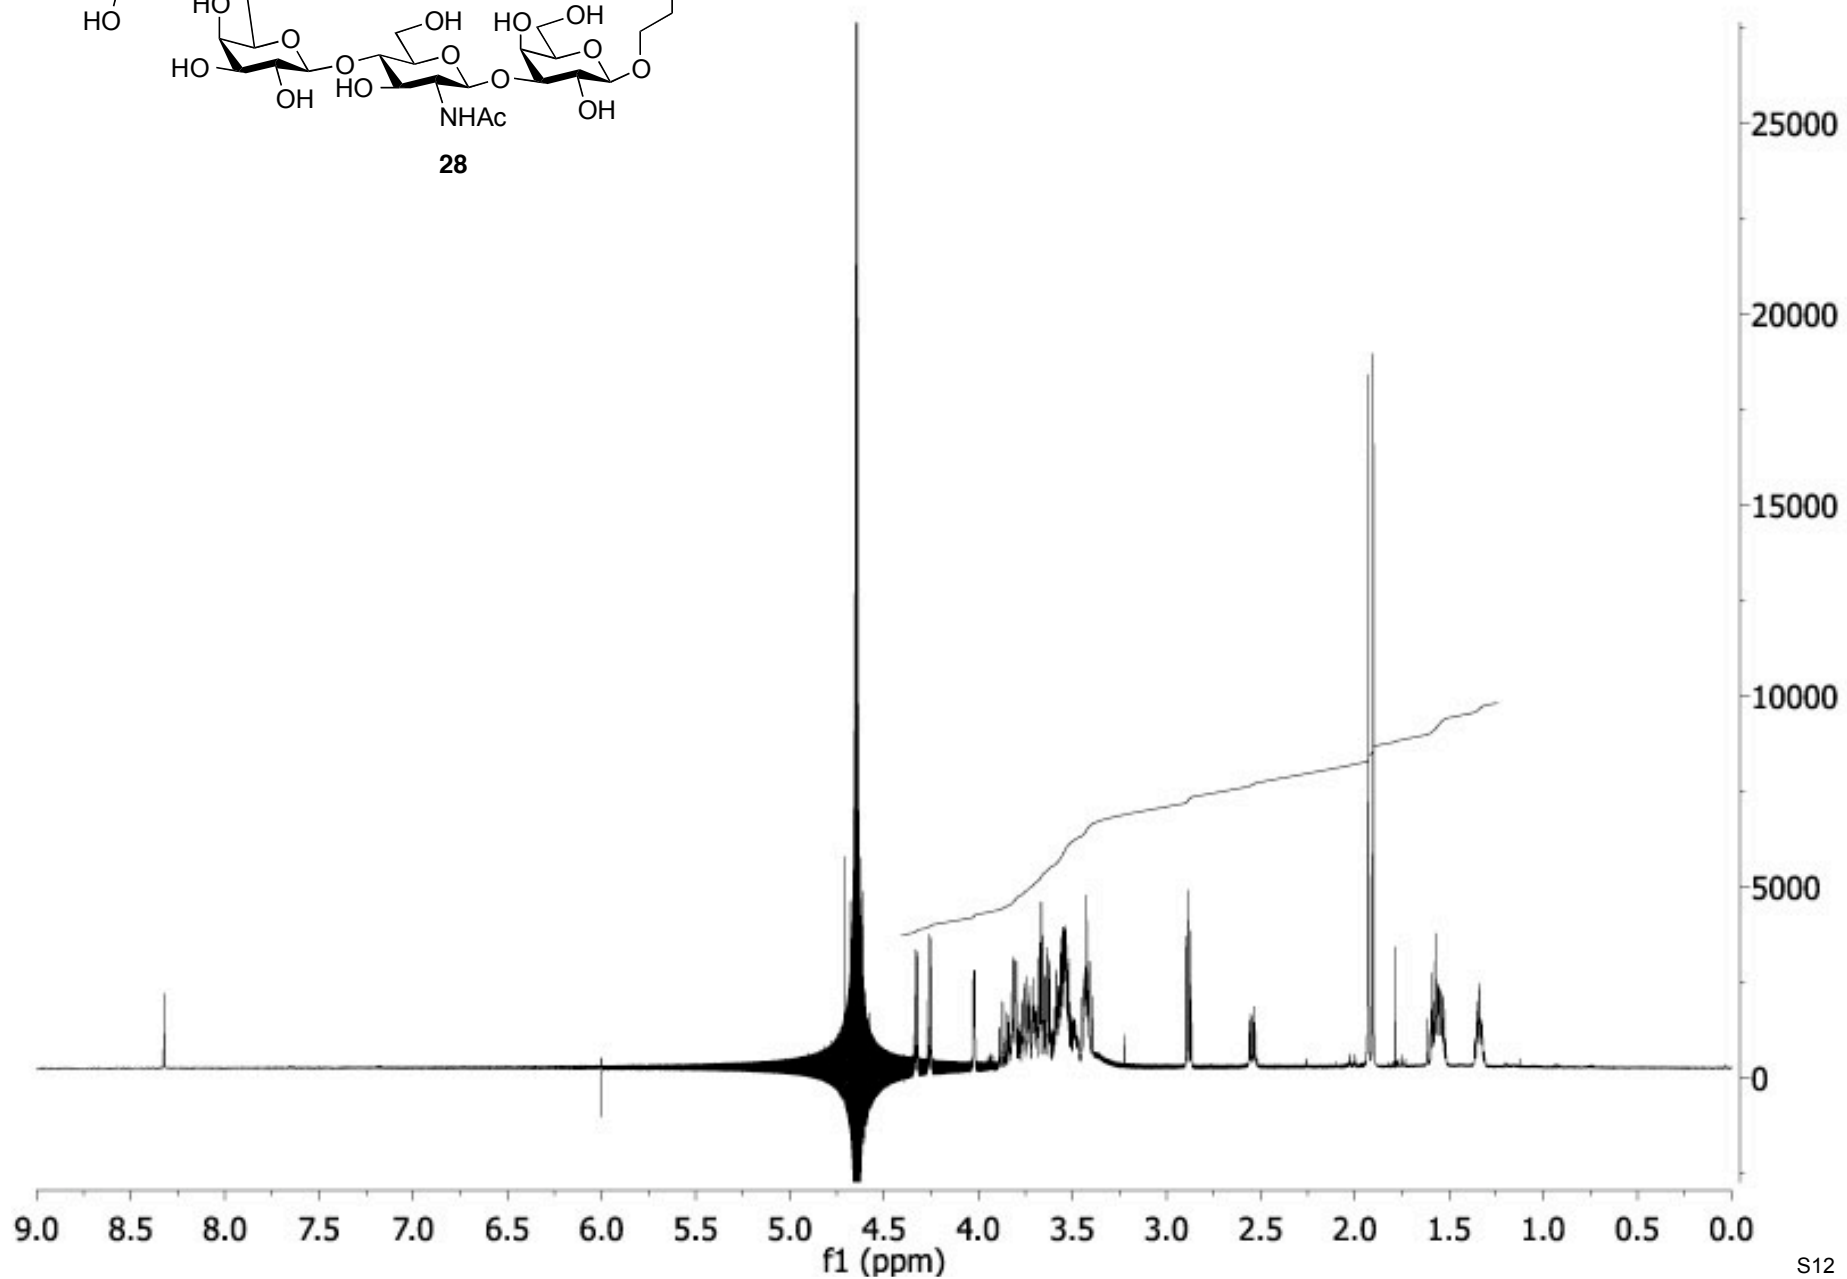

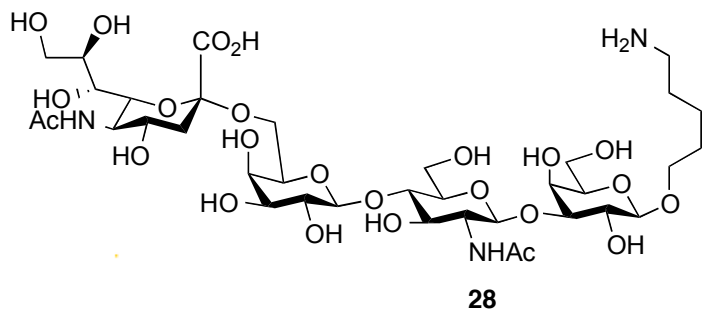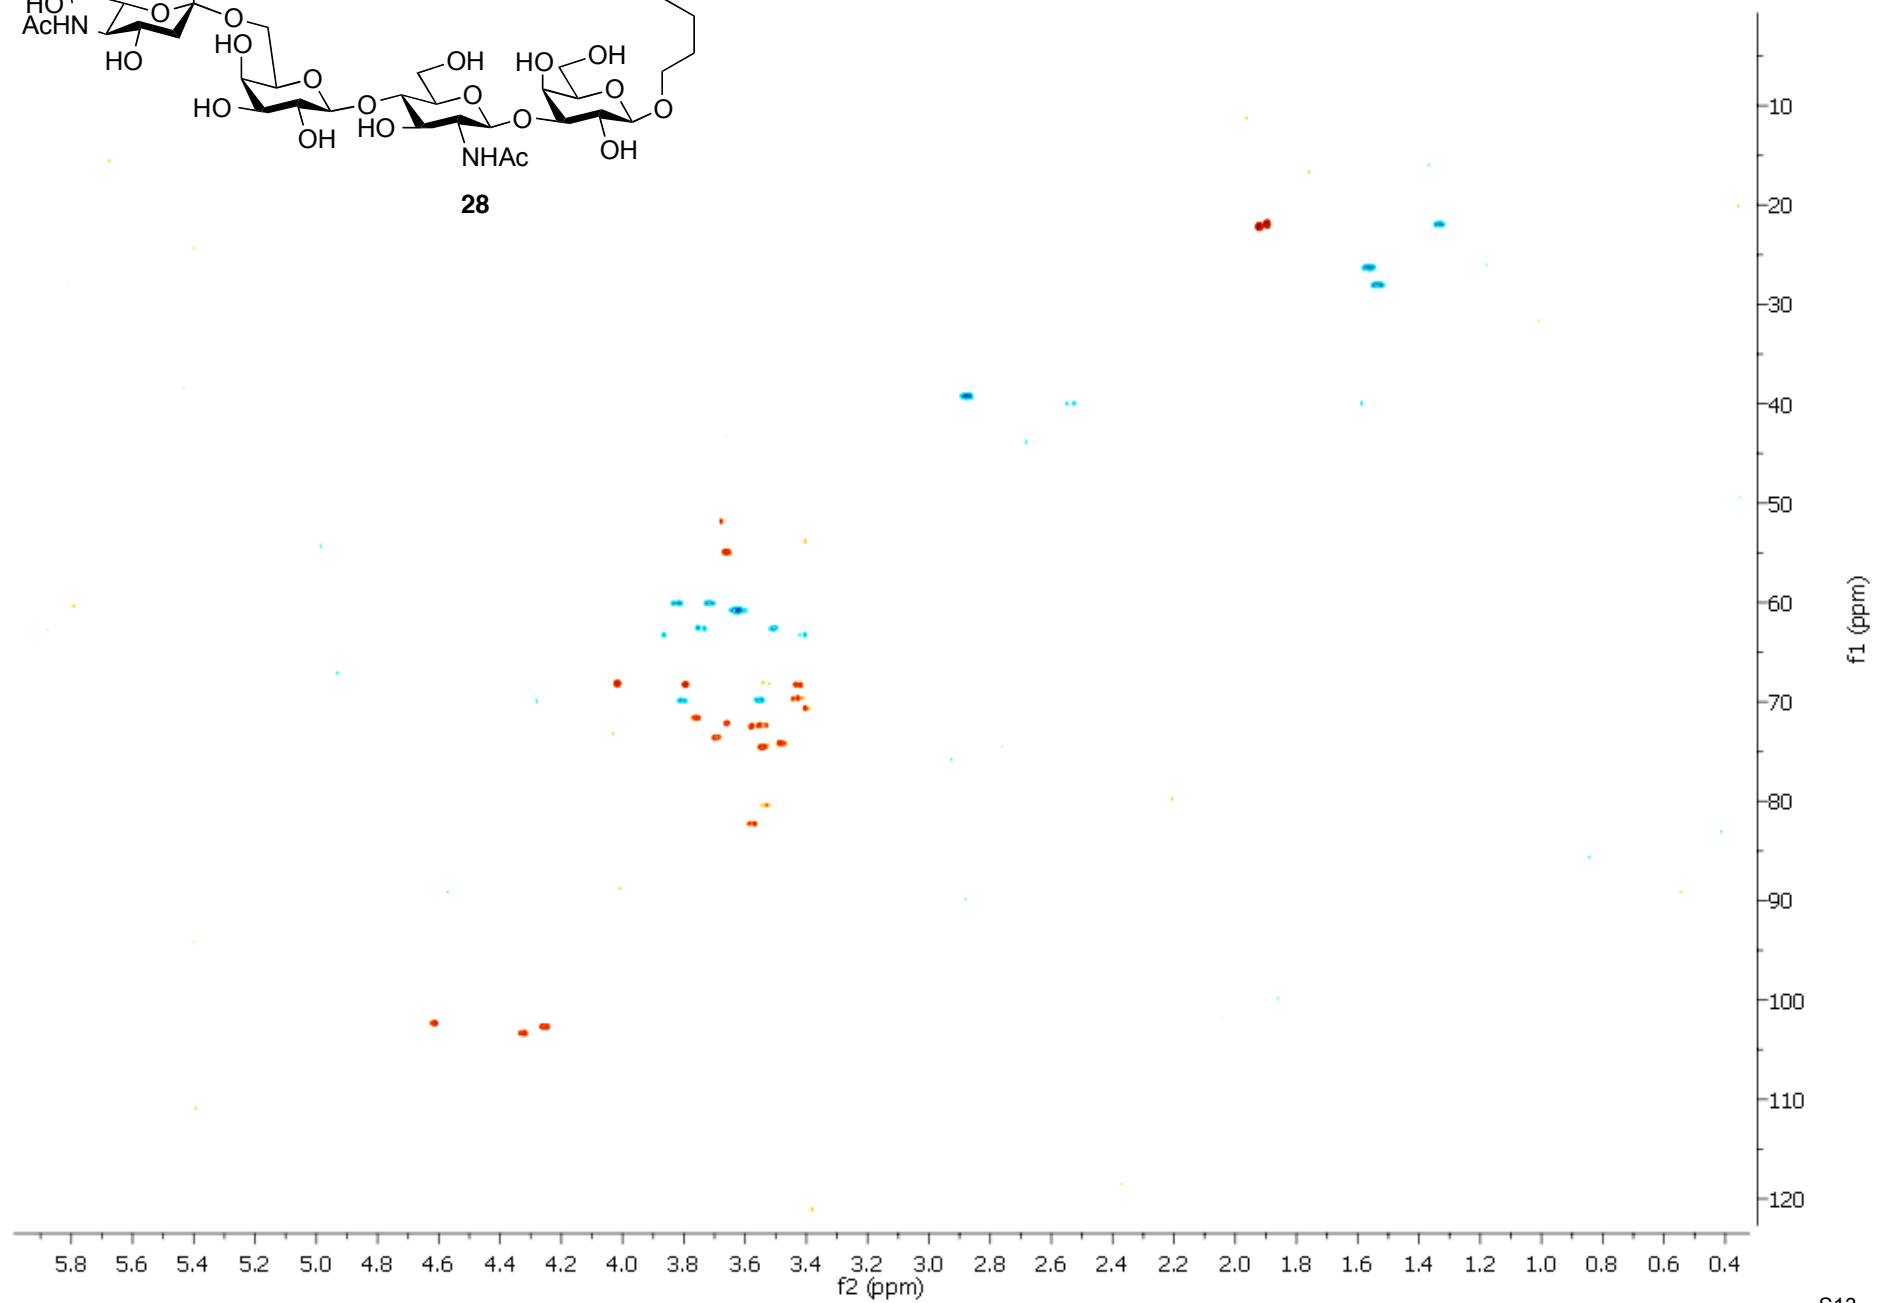

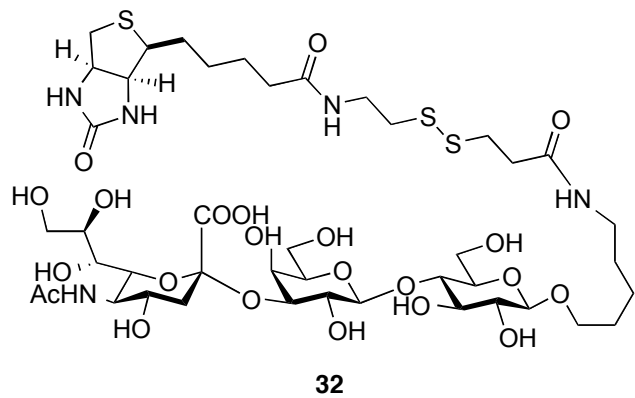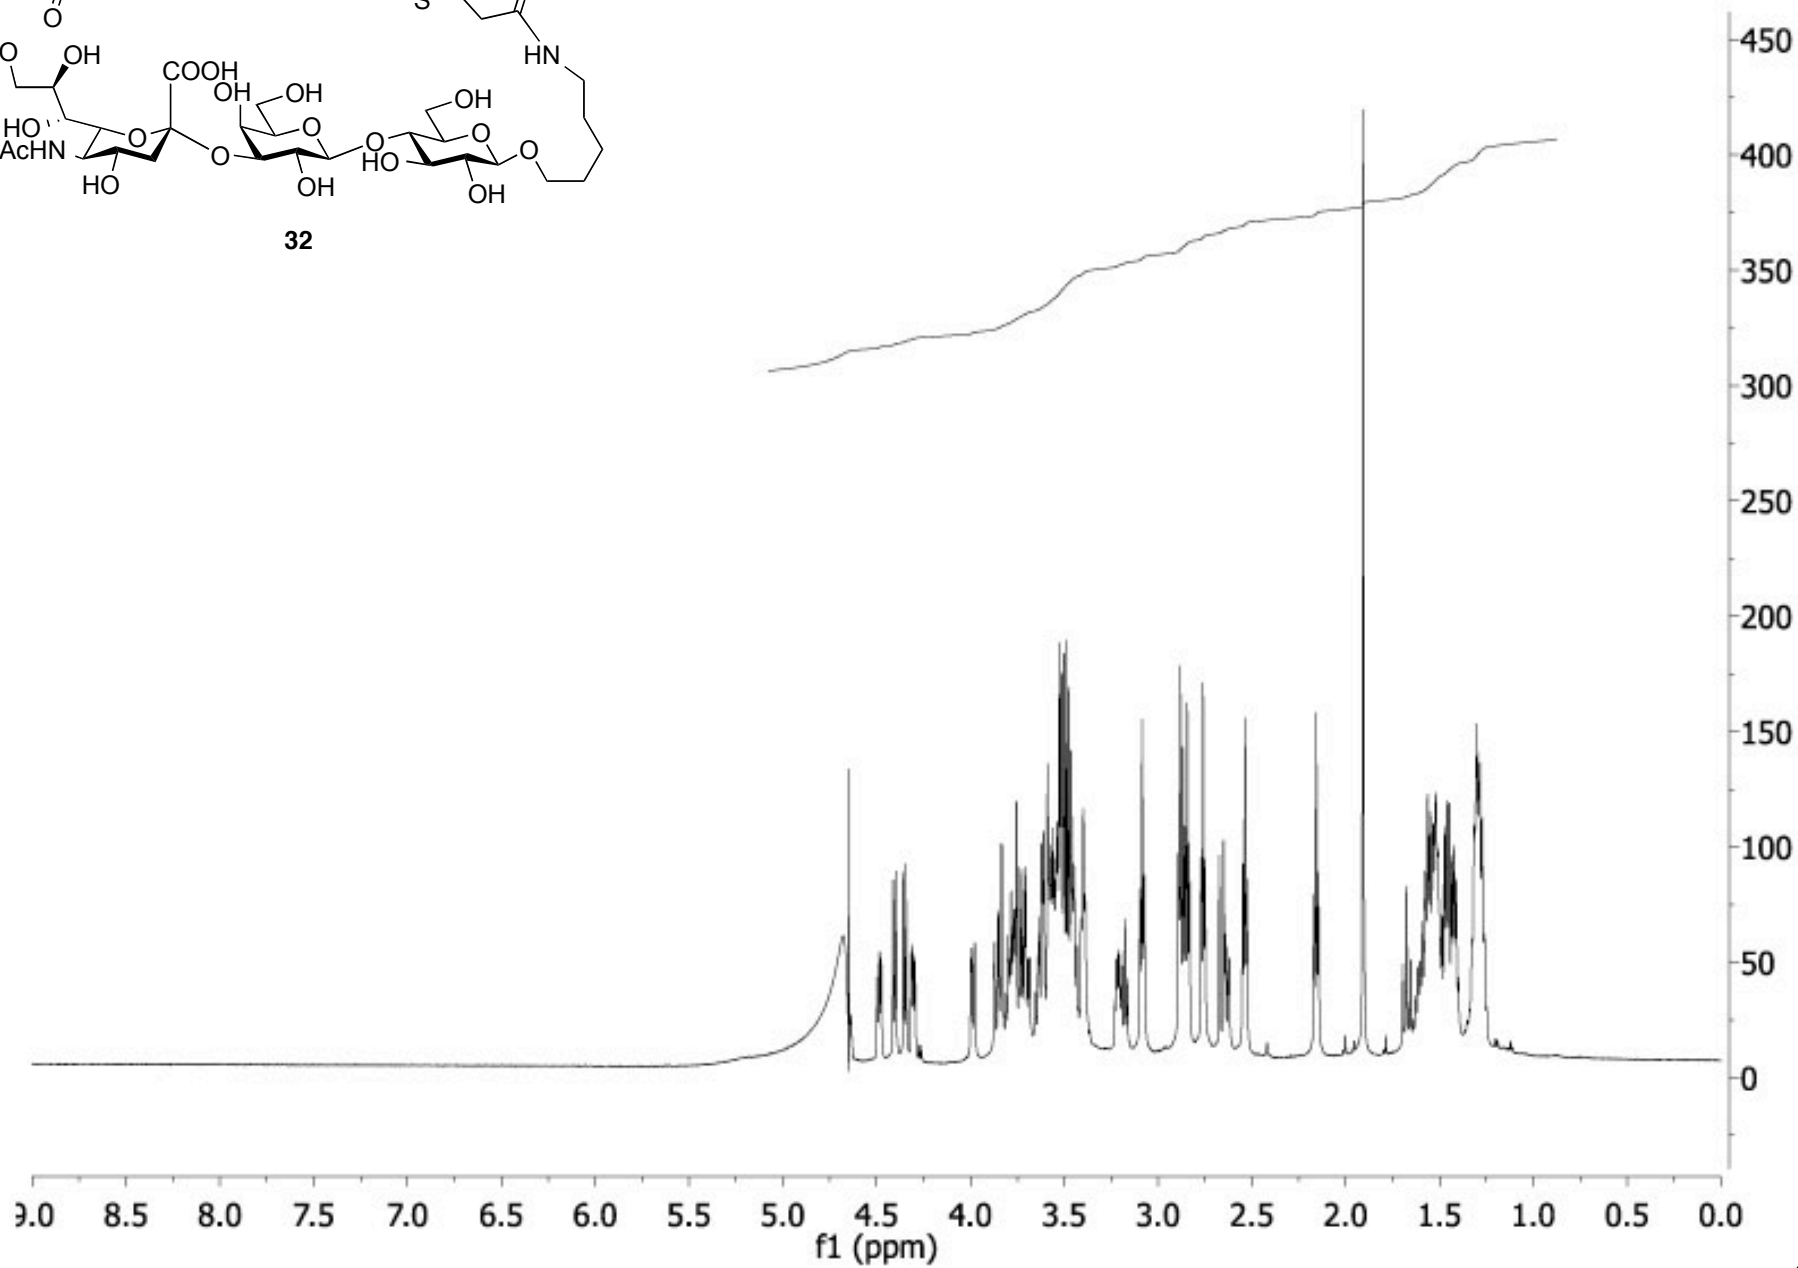

Supplement: Beilstein_J_Org_Chem-08-1601-s002.pdf [file Beilstein_J_Org_Chem-08-1601-s002.pdf]
